# Supplementary material for: Impact of shaping Aquivion PFSA on its catalytic performances
Source: Royal Society of Chemistry journal article supplement (doi:10.1039/c9cy00034h), 2019-01-01
Supplement: c9cy00034h1.pdf [file c9cy00034h1.pdf]

## Supporting Information

### Impact of the shaping of Aquivion PFSA on its catalytic performances in the Fischer glycosylation of glucose with *n*-dodecanol

Ayman Karam,<sup>a</sup> Ana Franco,<sup>b</sup> Magali Limousin,<sup>c</sup> Sinisa Marinkovic,<sup>c</sup> Boris Estrine,<sup>c</sup> Claudio Oldani,<sup>d</sup> Karine De Oliveira Vigier,<sup>a</sup> Rafael Luque<sup>b,e</sup> and François Jerome<sup>a\*</sup>

<sup>a</sup> Institut de Chimie des Milieux et Matériaux de Poitiers, CNRS/Université de Poitiers, 1 rue Marcel Doré, ENSIP, TSA 41105 86073 Poitiers cedex 9 (France).

<sup>b</sup> Departamento de Química Orgánica, Universidad de Córdoba, Campus de Rabanales, Edificio Marie Curie (C-3), Ctra Nnal IV-A, Km 396, 14014, Córdoba, Spain.

<sup>c</sup> ARD-Agro-industrie Recherches et Développements, Green Chemistry Department, Route de Bazancourt, F-51110 Pomacle, France

<sup>d</sup> Solvay Specialty Polymers, Viale Lombardia 20, 20021 Bollate MI, Italy

<sup>e</sup> Peoples Friendship University of Russia (RUDN University), 6 Miklukho-Maklaya street, Moscow, 117198, Russia

\* E-mail corresponding Author: [francois.jerome@univ-poitiers.fr](mailto:francois.jerome@univ-poitiers.fr)

**Figure S1.** Swelling of **AqPowd** in *n*-dodecanol after 7 h at 40°C (powder volume changed from 4.0 ml (initial) to 8.7 ml (final)). Swelling has been estimated to be 117.5 % ..... S2

**Figure S2.** Apparatus developed in house for measuring the effect of the shaping of Aquivion PFSA on the flow rate of an isopropanol solution: A stainless cartridge (Length/I.D. = 60/6 mm) filled with 1 g of different **AqPowd**, or **AqMicP** or **AqMacP** was connected to a Varian Pro Star 210 HPLC pump ..... S3

**Figure S3.** (a) picture of the 1 L reactor at the initial stage of the reaction and (b) metallic sieve of 125-160 microns employed for the recovery of **AqMicP** at the end of the reaction ..... S3

**Figure S4.** Overlapping of spectra of fresh **AqMicP** (red), used before washing **AqMicP** (blue) and used **AqMicP** after washing (purple) ..... S4

**Figure S5.** FT-IR spectrum magnification from 700 to 1800 cm<sup>-1</sup> showing normalized bands at 970 and 1060 cm<sup>-1</sup> ..... S4

**Figure S6.** Color of used **AqMicP** after (a) 1.25 h of reaction time and (b) 8 h of reaction time ..... S5

**Chemical and reagents:** Glucose, *n*-Dodecanol and H<sub>2</sub>SO<sub>4</sub> were purchased to Sigma-Aldrich and were used without further purification. **AqPowd**, **AqMicP** and **AqMacP** were kindly provided by Solvay Specialty Polymers.

Gas chromatography (GC) analyses were performed on a Varian 3900 instrument equipped with a flame ionization detector and an HT5 column (30 m x 0.32 mm x 0.25  $\mu$ m). The oven was heated from 90 to 220 °C with a heating ramp of 10 °C/min and then to 320 °C with a heating ramp of 5 °C/min..

### Additional figures

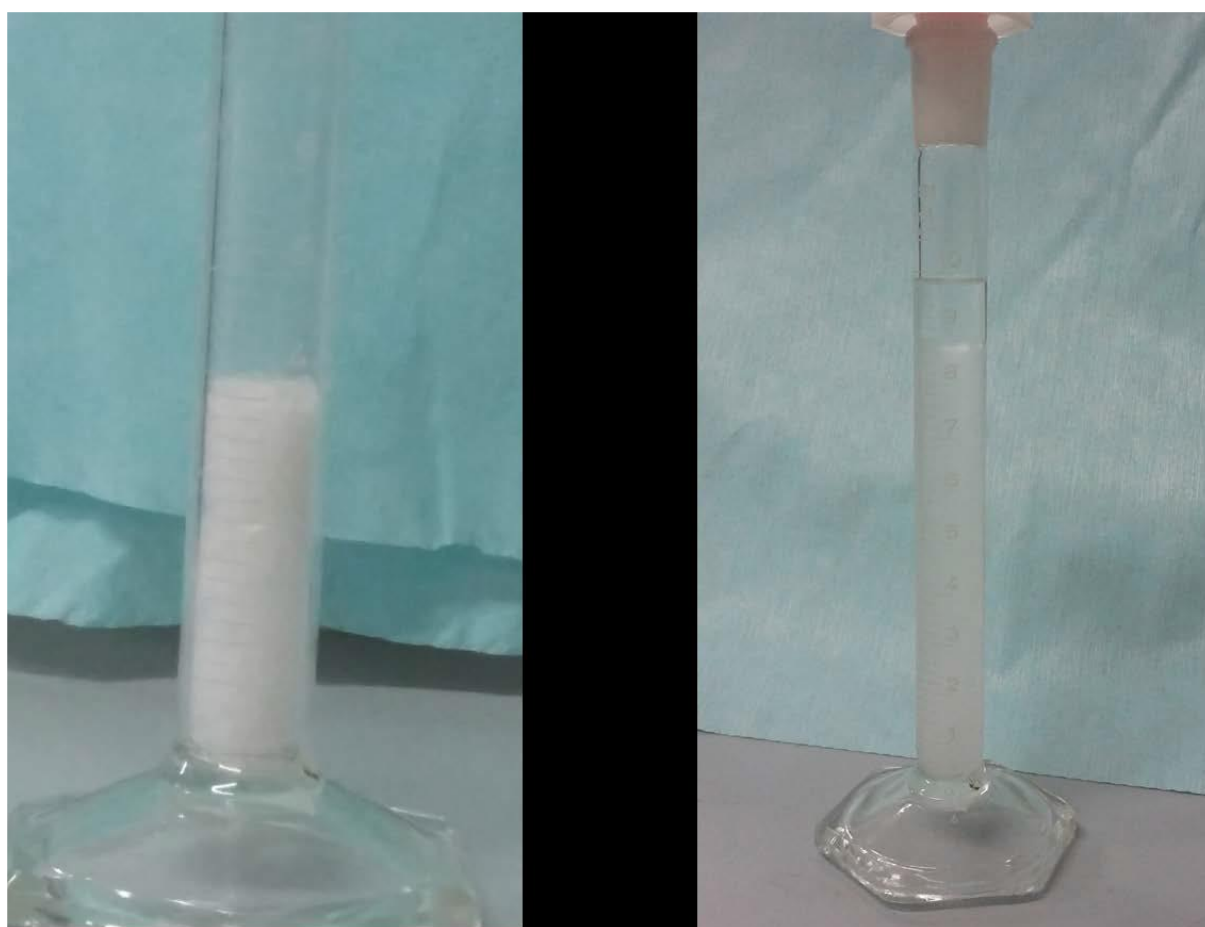

**Figure S1.** Swelling of **AqPowd** in *n*-dodecanol after 7 h at 40°C (powder volume changed from 4.0 ml (initial) to 8.7 ml (final)). Swelling has been estimated to be 117.5 %.

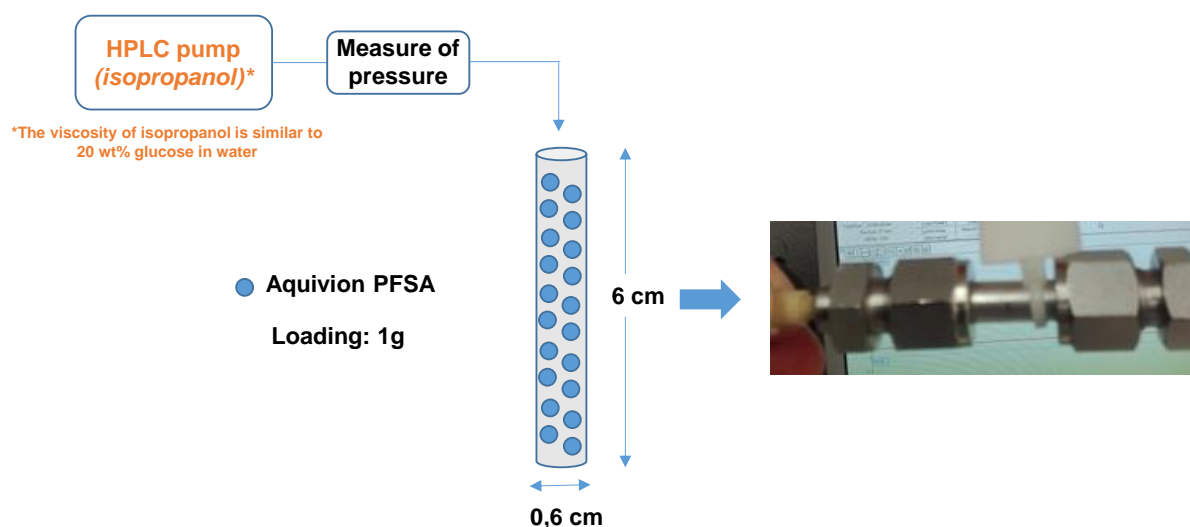

**Figure S2.** Apparatus developed in house for measuring the effect of the shaping of Aquivion PFSA on the flow rate of an isopropanol solution: A stainless cartridge (Length/I.D. = 60/6 mm) filled with 1 g of different **AqPowd**, or **AqMicP** or **AqMacP** was connected to a Varian Pro Star 210 HPLC pump.

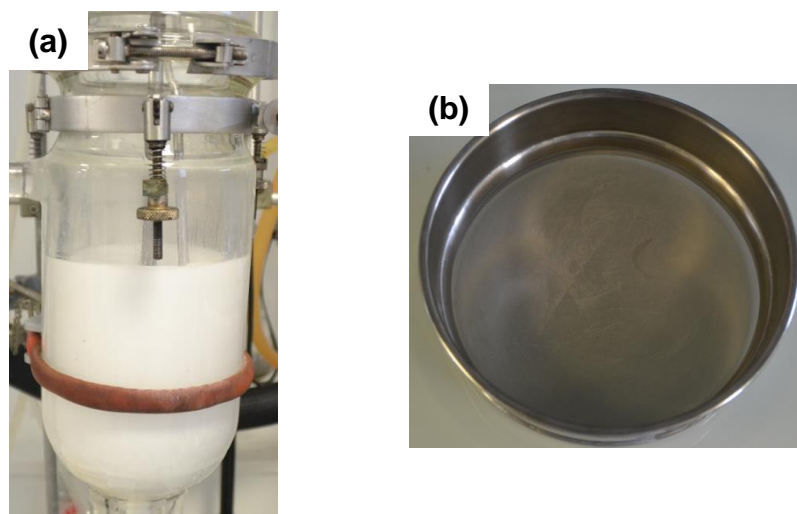

**Figure S3.** (a) picture of the 1 L reactor at the initial stage of the reaction and (b) metallic sieve of 125-160 microns employed for the recovery of **AqMicP** at the end of the reaction.

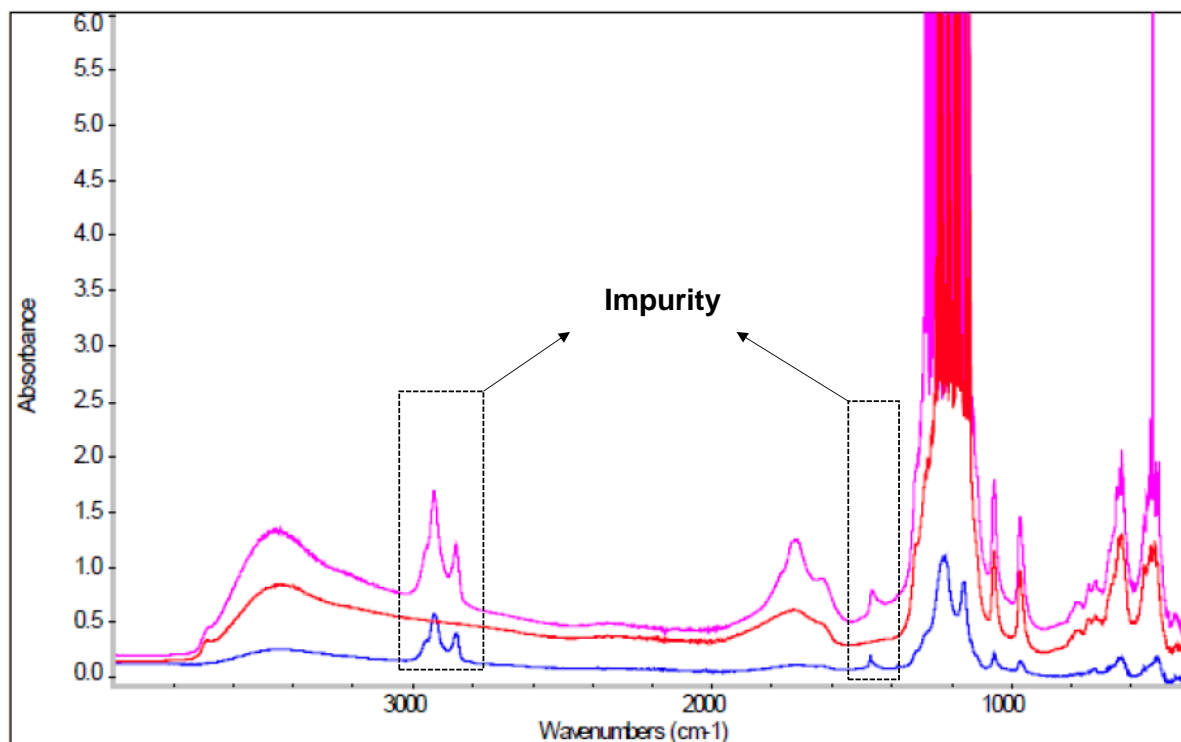

**Figure S4.** Overlapping of spectra of fresh **AqMicP** (red), used before washing **AqMicP** (blue) and used **AqMicP** after washing (purple).

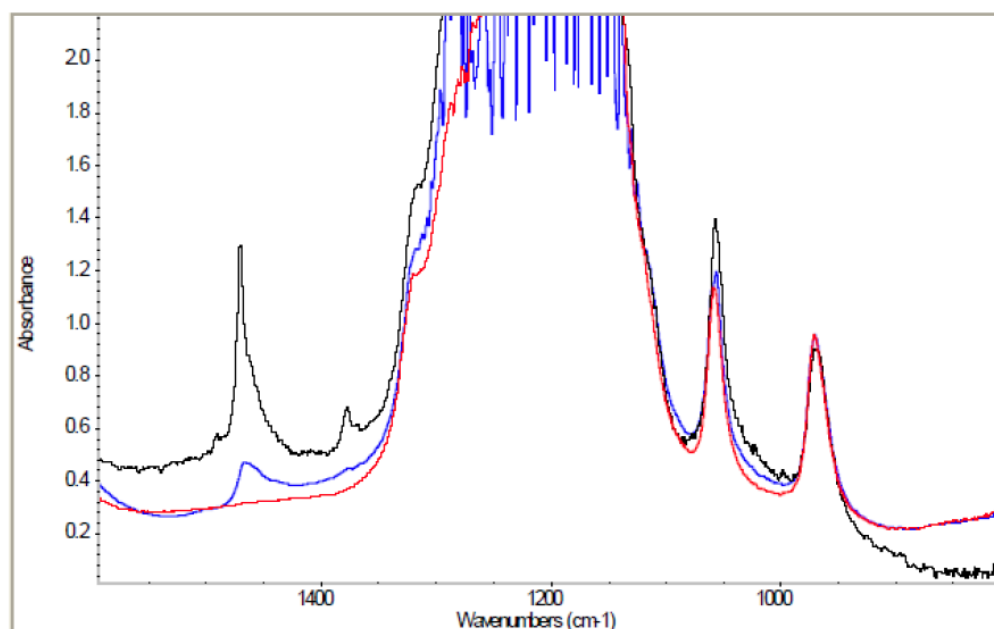

**Figure S5.** FT-IR spectrum magnification from 700 to 1800  $\text{cm}^{-1}$  showing normalized bands at 970 and 1060  $\text{cm}^{-1}$ .

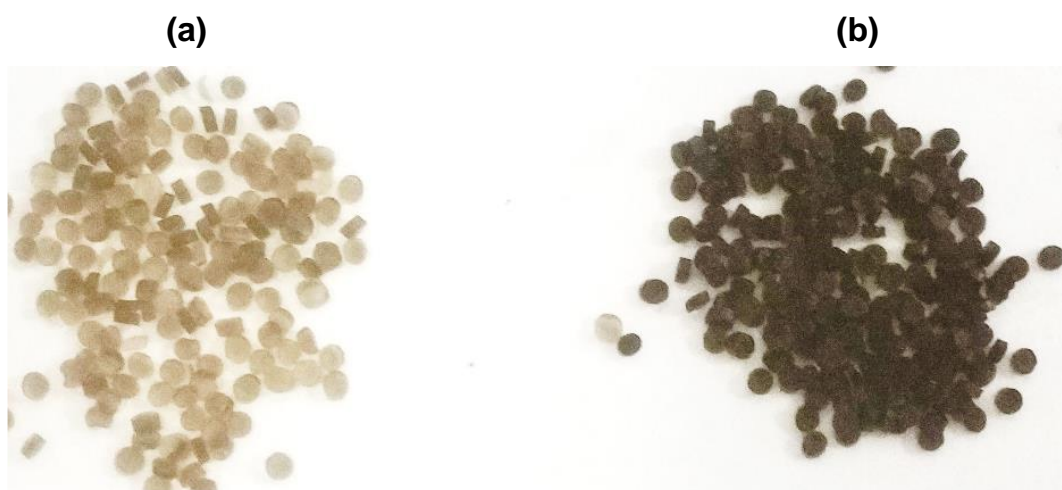

**Figure S6.** Color of used AqMicP after (a) 1.25 h of reaction time and (b) 8 h of reaction time
